# Supplementary material for: Emerging role of circANRIL expression in peripheral blood mononuclear cells as a promising liquid biopsy diagnostic biomarker for coronary artery disease
Source: Research Square preprint supplement (doi:10.21203/rs.3.rs-1300387/v1), 2022-02-01
Supplement: Supplementary file 2 [file 7fa17e0c1489d95955c592b6.docx]

| **SNP Genotypic Frequencies n (%) P-Value Allelic Frequencies X2 OR/CI(95%) P-Value** |
| --- |
| **Genotype CAD(n=200) non-CAD (n=220) Allele CAD(n=200) non-CAD (n=220)** |
| **rs10757274**  **AA 73(36.5) 159(72.3)**  **AG 88(44) 53(24.1) *0.001* A/G 0.58/0.42 0.84/0.16 69.31 3.81/2.75-5.27 *0.001***  **GG 39(19.5) 8 (3.6)** |
| **rs2383207**  **AA 3(1.5) 8(3.6)**  **AG 38(19) 43(19.5) 0.379 A/G 0.11/0.89 0.13/0.87 1.13 1.25/0.82-1.90 0.287**  **GG 159(79.5) 169(76.8)** |
| **rs2383206**  **AA 44(22) 120(54.5)**  **AG 110(55) 79(35.9) *0.001* A/G 0.49/0.51 0.72/0.28 46.83 2.69/2.01-3.58 *0.001***  **GG 46(23) 21(9.6)** |
| **rs10811656**  **CC 40(20) 125(56.8)**  **CT 100(50) 75(34.1) *0.001* C/T 0.45/0.55 0.74/0.26 72.80 3.45/2.58-4.61 *0.001***  **TT 60(30) 20(9.1)** |
| **rs10757278**  **AA 75(37.5) 165(75)**  **AG 97(48.5) 47(21.4) *0.001* A/G 0.62/0.38 0.86/0.14 62.82 3.70/2.65-5.18 *0.001***  **GG 28(14) 8(3.6)** |

**Supplementary Table 1:** The genotypic and allelic frequency distributions of SNPs on chromosome 9p21.3 in study groups

OR: Odd Ratio, CI: Confidence Interval *The genotypic and allelic frequency distributions of polymorphisms between the groups were compared using x2 and HWE test. In all cases differences were considered significant at p< 0.05.
